# Supplementary material for: Hydrothermal synthesis of functionalized magnetic MIL-101 for magnetic enrichment of estrogens in environmental water samples
Source: Royal Society of Chemistry journal article supplement (doi:10.1039/c5ra23132a), 2016-01-01
Supplement: c5ra23132a1.pdf [file c5ra23132a1.pdf]

## Electronic Supplementary Information

### Hydrothermal synthesis of functionalized magnetic MIL-101 for magnetic enrichment of estrogens in environmental water samples †

**Yan-Feng Huang,<sup>\*a,b</sup> Min Liu,<sup>a</sup> Yan-Qi Wang,<sup>a</sup> Ying Li,<sup>\*a</sup> Ji-Mei Zhang<sup>a</sup> and Shu-Hui Huo<sup>c</sup>**

<sup>a</sup> State Key Laboratory of Hollow Fiber Membrane Material and Membrane Process, and College of Environmental and Chemical Engineering Sciences, Tianjin Polytechnic University, 399 West Binshui Road, Tianjin 300387, China. E-mail: huangyanfeng@tjpu.edu.cn, ly@tjpu.edu.cn; Tel: +86-22-83955167; fax: +86-22-83955167.

<sup>b</sup> College of Environmental and Chemical Engineering Sciences, Tianjin Polytechnic University, 399 West Binshui Road, Tianjin 300387(China).

<sup>c</sup> Key Laboratory of Eco-Environment-Related Polymer Materials of Education, College of Chemistry and Chemical Engineering, Northwest Normal University, Lanzhou 730070, China.

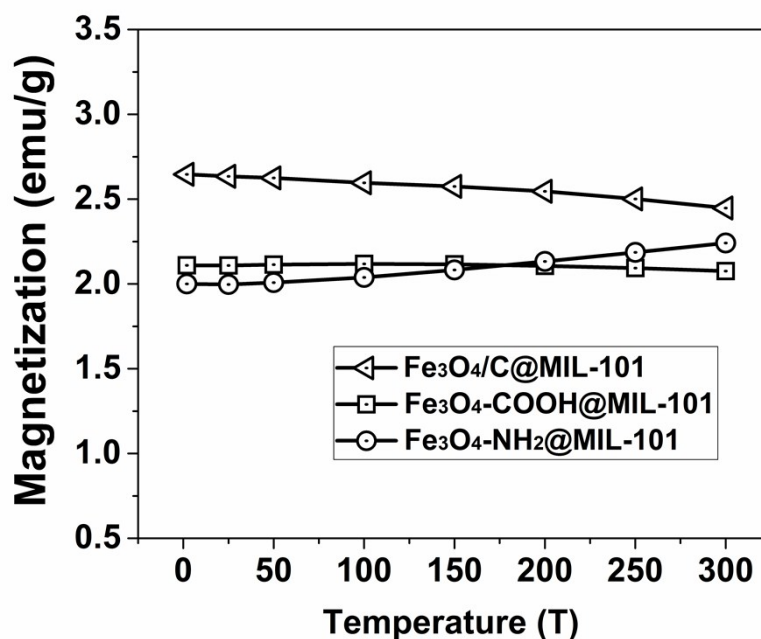

**Fig.S1.** Temperature dependence of magnetizations curves for samples Fe<sub>3</sub>O<sub>4</sub>-NH<sub>2</sub>@MIL-101, Fe<sub>3</sub>O<sub>4</sub>-COOH@MIL-101, and Fe<sub>3</sub>O<sub>4</sub>/C@MIL-101 from 300 to 0 K with an applied field of 100 Oe.

In the high-resolution XPS spectrum (Fig. S2-5 (b)), the C 1s spectrum displays two peaks centering at about 285.0 and 288.9 eV. They can be ascribed to the carbon components on the benzene ring and the carboxylate (O—C=O) groups of the BDC linkers, respectively.

The O 1s could be fitted by two peaks at binding energies of around 532.2 and 530.2 eV, which are attributed to the oxygen components in the BDC linkers and the Cr—O bonds, respectively (Fig. S3-5 (c)).

The binding energies of about 577.5 and 587.3 eV are characteristic of Cr<sup>3+</sup> in MIL-101 (Fig. S3-5 (d)).

Observation of the Fe 2p spectrum (Fig. S3-5(e)), the binding energies of around 711 and 724.6 eV are typical of magnetite.

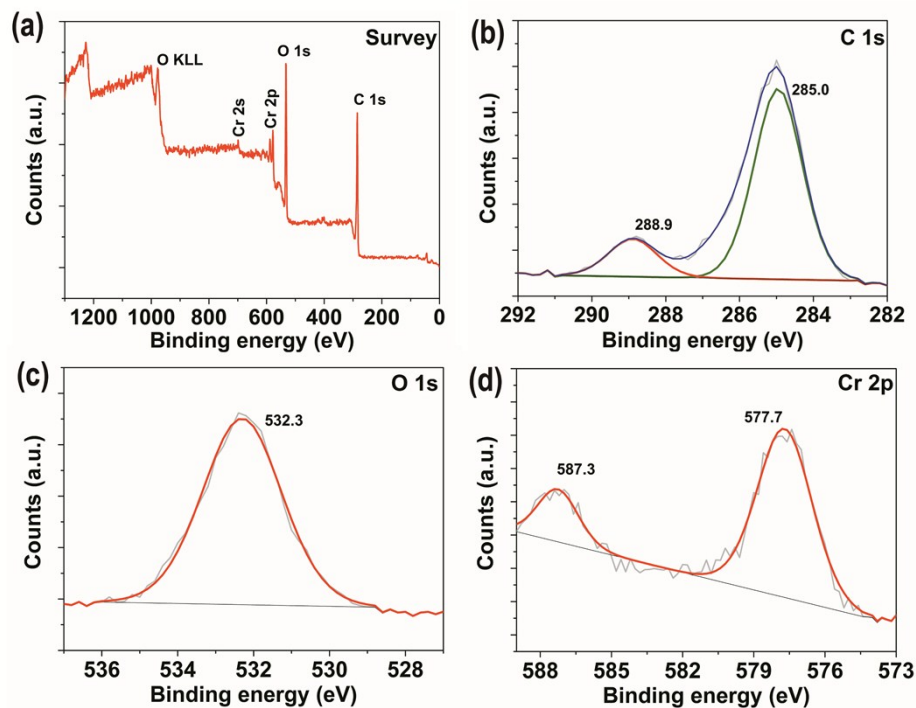

**Fig.S2.** The XPS spectra of MIL-101: (a) survey scan, (b) C 1s, (c) O 1s, (d) Cr 2p.

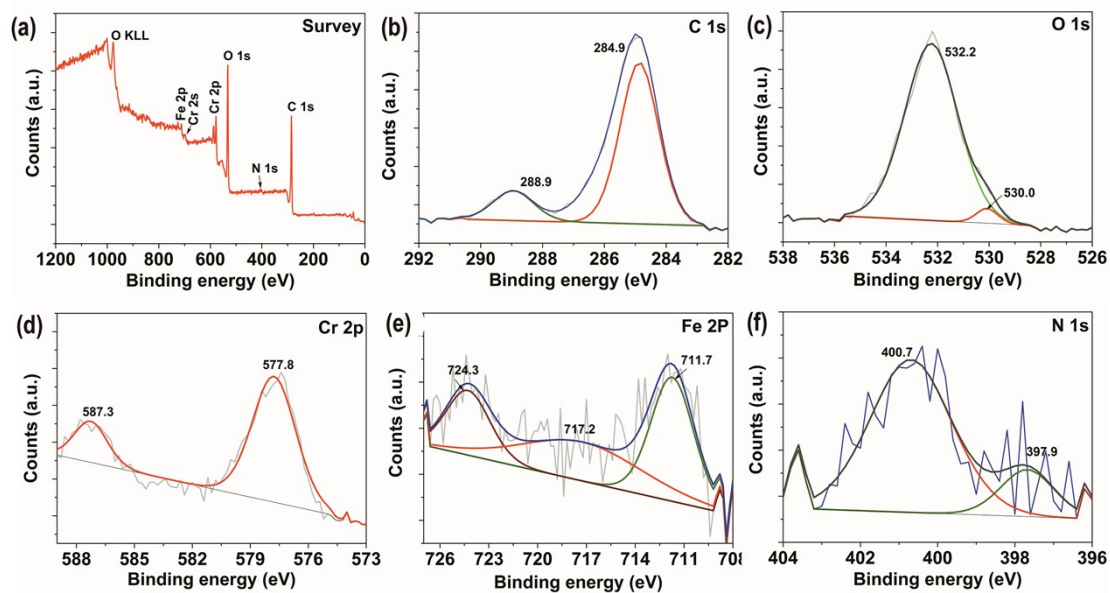

**Fig.S3.** The XPS spectra of  $\text{Fe}_3\text{O}_4\text{-NH}_2\text{@MIL-101}$ : (a) survey scan, (b) C 1s, (c) O 1s, (d) Cr 2p, (e) Fe 2p, (f) N 1s.

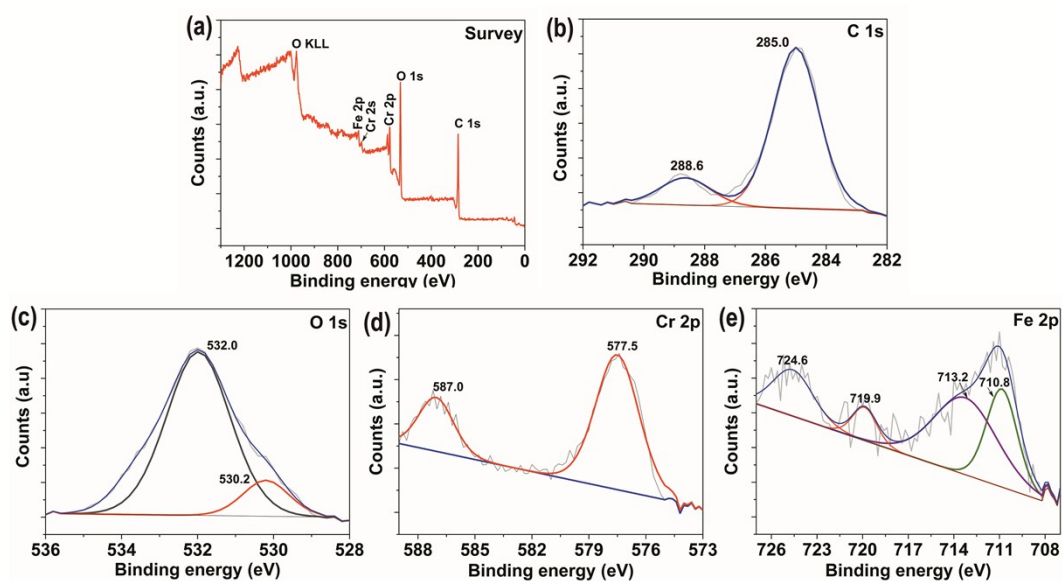

**Fig. S4.** The XPS spectra of  $\text{Fe}_3\text{O}_4\text{-COOH@MIL-101}$ : (a) survey scan, (b) C 1s, (c) O 1s, (d) Cr 2p, (e) Fe 2p.

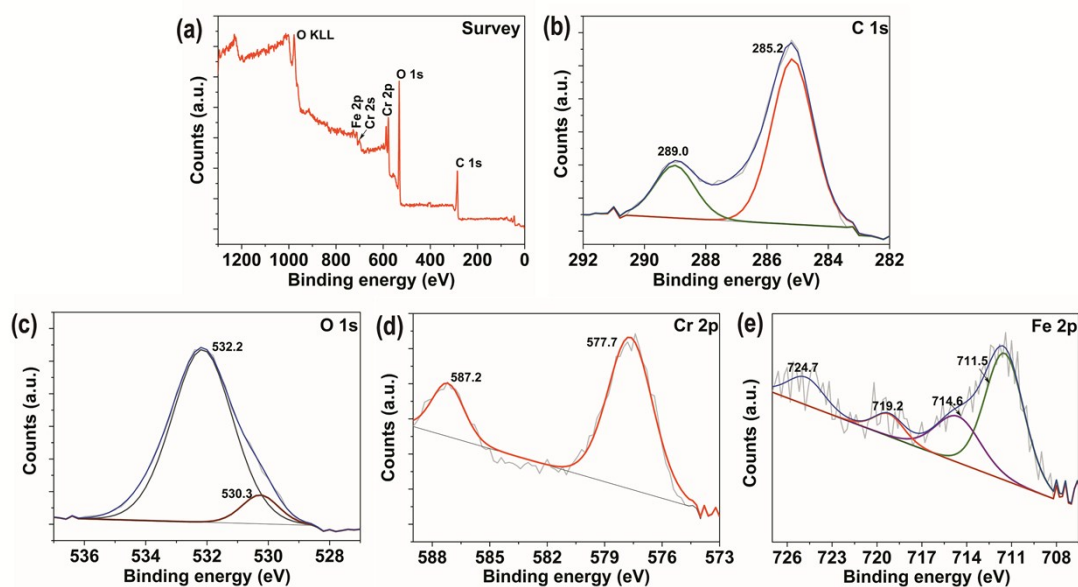

**Fig.S5.** The XPS spectra of  $\text{Fe}_3\text{O}_4/\text{C@MIL-101}$ : (a) survey scan, (b) C 1s, (c) O 1s, (d) Cr 2p, (e) Fe 2p.

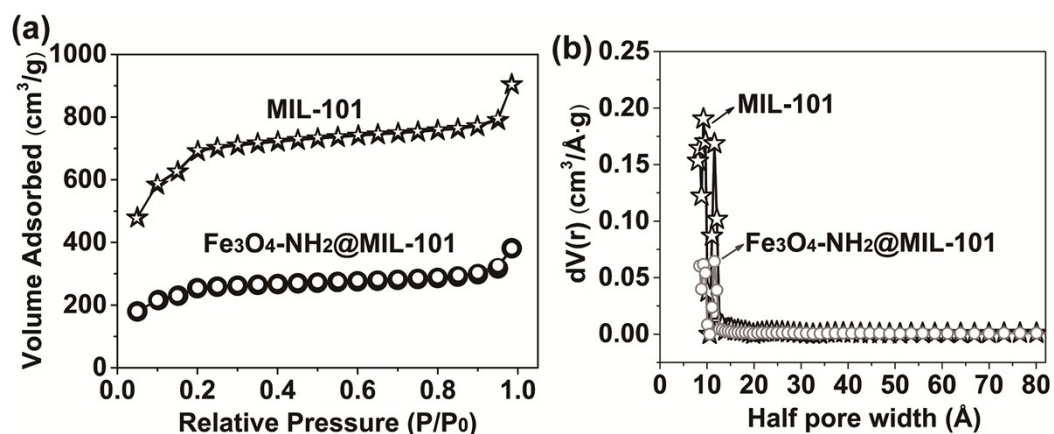

**Fig. S6.** (A) N<sub>2</sub> adsorption–desorption isotherms and (B) the pore size distribution of MIL-101 and Fe<sub>3</sub>O<sub>4</sub>-NH<sub>2</sub>@MIL-101.

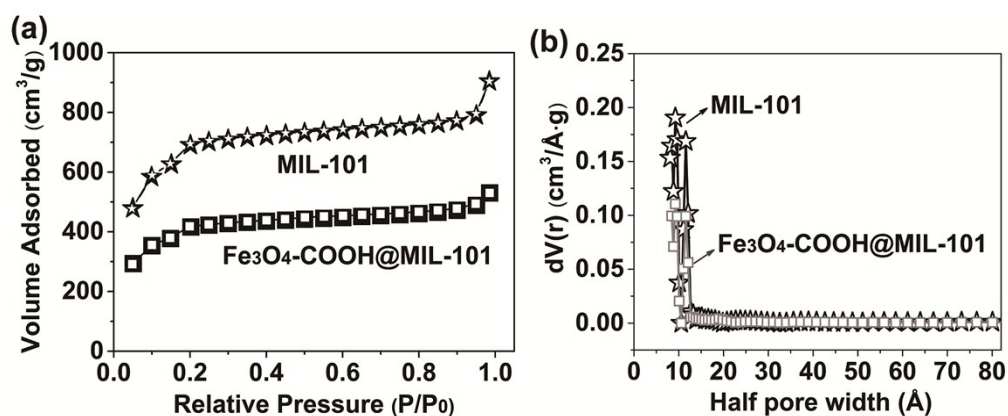

**Fig. S7.** (A) N<sub>2</sub> adsorption–desorption isotherms and (B) the pore size distribution of MIL-101 and Fe<sub>3</sub>O<sub>4</sub>-COOH@MIL-101.

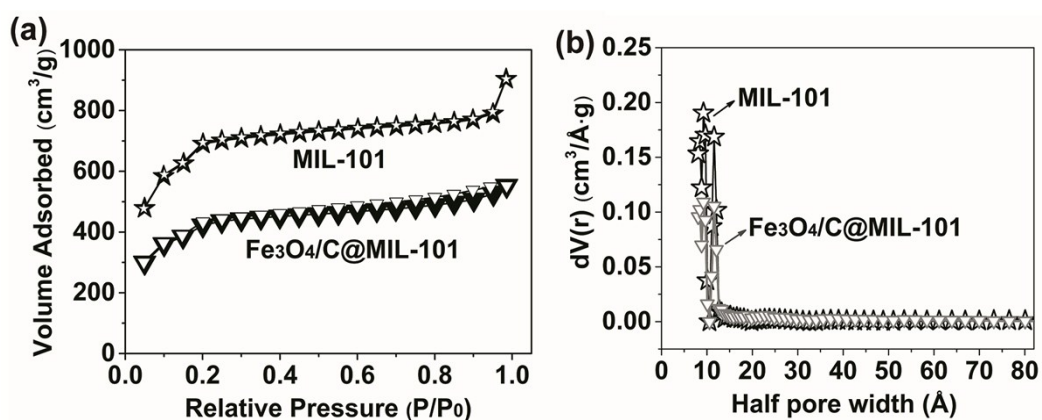

**Fig. S8.** (A) N<sub>2</sub> adsorption–desorption isotherms and (B) the pore size distribution of MIL-101 and Fe<sub>3</sub>O<sub>4</sub>/C@MIL-101.

TableS1. The BET surface area and total pore volume of the materials.

| Materials                                                | BET surface area<br>(m <sup>2</sup> /g) | Total pore<br>volume<br>(cm <sup>3</sup> /g) |
|----------------------------------------------------------|-----------------------------------------|----------------------------------------------|
| MIL-101                                                  | 2521.916                                | 1.398                                        |
| Fe <sub>3</sub> O <sub>4</sub> -NH <sub>2</sub> @MIL-101 | 923.549                                 | 0.59                                         |
| Fe <sub>3</sub> O <sub>4</sub> -COOH@MIL-101             | 1513.137                                | 0.8203                                       |
| Fe <sub>3</sub> O <sub>4</sub> /C@MIL-101                | 1535.457                                | 0.8547                                       |
